# Supplementary material for: The combination of block copolymers and phospholipids to form giant hybrid unilamellar vesicles (GHUVs) does not systematically lead to “intermediate” membrane properties
Source: Royal Society of Chemistry journal article supplement (doi:10.1039/c8sm00547h), 2018-01-01
Supplement: c8sm00547h1.pdf [file c8sm00547h1.pdf]

## SUPPORTING INFORMATION

**The combination of block copolymers and phospholipids to form Giant Hybrid Unilamellar Vesicles (GHUVs) does not systematically lead to “intermediate” membrane properties.**

T.P.T. Dao<sup>1,2,3</sup>, M. Fauquignon<sup>1,2</sup>, F. Fernandes\*<sup>3</sup>, E. Ibarboure<sup>1,2</sup>, M. Prieto<sup>3</sup>, and J. F. Le Meins\*<sup>1,2</sup>

### I- Membrane mechanical properties, micropipette aspiration

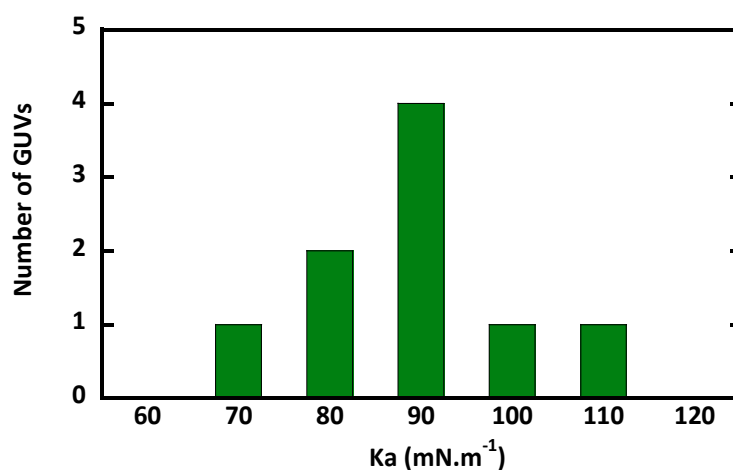

**Figure S1.** Distribution of area compressibility moduli measured for 9 individual DOW GUVs. The average value was  $\bar{K}_a = 84.3 \pm 12.2$  mN.m<sup>-1</sup>.

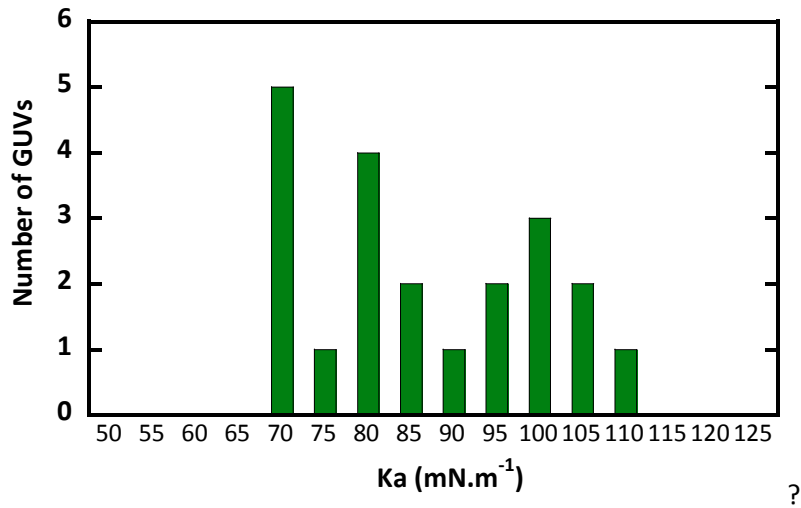

**Figure S2.** Distribution of area compressibility moduli measured for 21 individual 3K. The average value was  $K_a = 84 \pm 13 \text{ mN.m}^{-1}$ .

| Sample        | $K_a \pm \text{SD (mN.m}^{-1}\text{)}$ | $\alpha_c \pm \text{SD (\%)}$ | $\sigma_c \pm \text{SD (mN.m}^{-1}\text{)}$ |
|---------------|----------------------------------------|-------------------------------|---------------------------------------------|
| 3K            | $84 \pm 13$                            | $7.3 \pm 1.3$                 | $5.5 \pm 1.7$                               |
| 3K/POPC 95/5  | $109 \pm 20$                           | $1.8 \pm 0.6$                 | $1.9 \pm 0.5$                               |
| 3K/POPC 90/10 | $128 \pm 11$                           | $1.8 \pm 0.5$                 | $2.0 \pm 0.4$                               |
| 3K/POPC 80/20 | $130 \pm 30$                           | $1.9 \pm 0.5$                 | $2.0 \pm 0.3$                               |

**Table S1.** Mechanical properties under stretching for hybrid vesicles:

## II- Lateral diffusion coefficients, FRAP Experiments

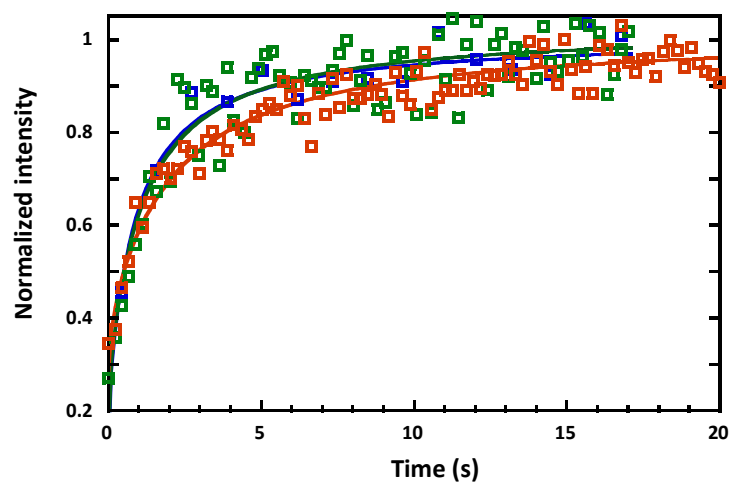

**Figure S3.** Representative FRAP data obtained for different polymersomes: (□): DOW, (□): 1.5K; (□):3K containing 1.5 mol% of DOW-F. The smooth lines correspond to the fits of the formalism described in experimental section.

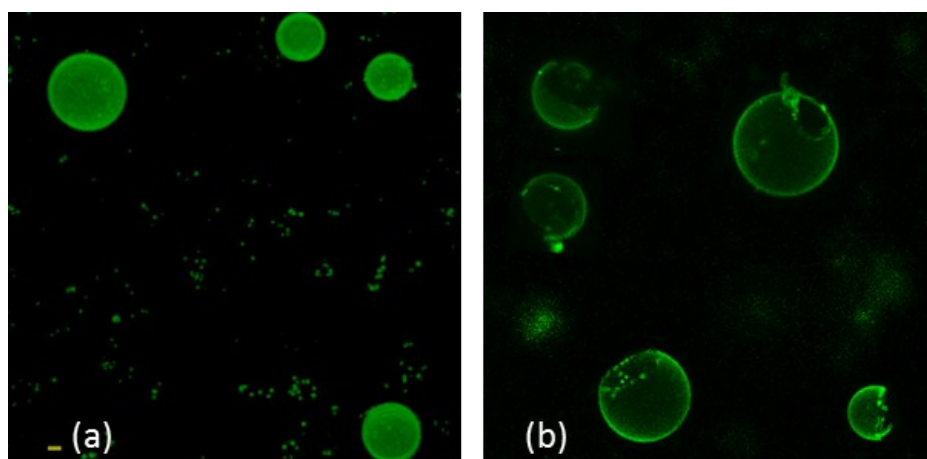

**Figure S4** 2D maximum intensity projection images of 1.5K/POPC GHUVs labeled with 1.5% PDMS<sub>26</sub>-*g*-(PEO<sub>12</sub>)<sub>2</sub>-FITC: (a): 10% POPC (no macroscopic domains) and (b): 50% POPC (macroscopic POPC domains appear as non-fluorescent phases); scale bars: 5  $\mu$ m.

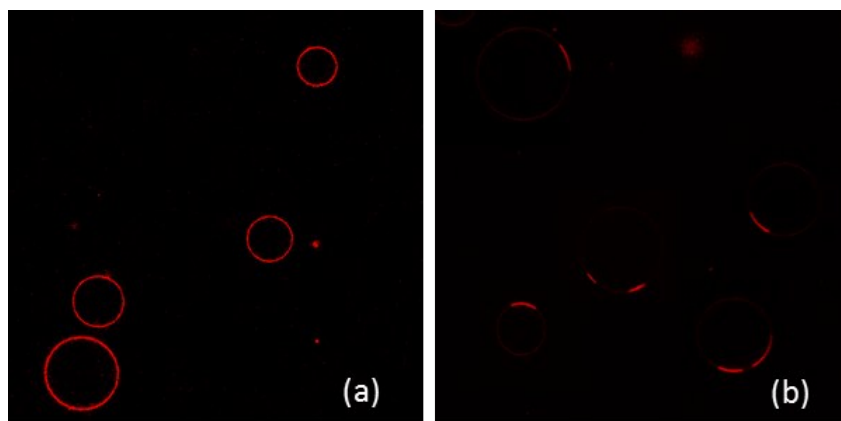

**Figure S5:** Equatorial images of 1.5K/POPC GHUVs labeled with 0.2 mol% DOPE-Rhod and composed of (a): 10% POPC and (b): 30% POPC.
